# Supplementary material for: Adult spinal motoneurons change their neurotransmitter phenotype to control locomotion
Source: PubMed Central journal article supplement — Proc Natl Acad Sci U S A. 2018 Oct 1;115(42):E9926–33. doi: 10.1073/pnas.1809050115 (PMC6196516; doi:10.1073/pnas.1809050115), 2018-10-01
Supplement: pnas.1809050115.sapp.pdf [file pnas.1809050115.sapp.pdf]

## Supplementary Information for

### **Adult spinal motoneurons change their neurotransmitter phenotype to control locomotion**

Maria Bertuzzi, Weipang Chang, Konstantinos Ampatzis

Konstantinos Ampatzis

Email: [Konstantinos.Ampatzis@ki.se](mailto:Konstantinos.Ampatzis@ki.se)

#### **This PDF file includes:**

Figs. S1 to S7

Tables S1 to S2



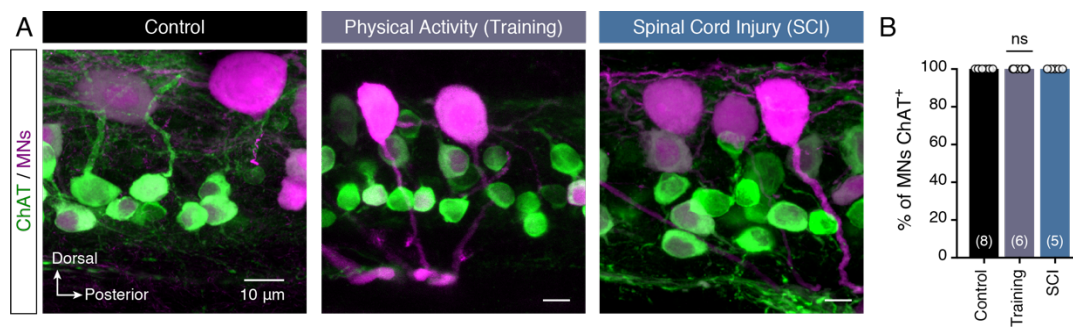

**Fig. S2. Motoneurons always remain cholinergic.** (A) Representative whole mount confocal images showing ChAT immunoreactivity of retrograde labelled spinal motoneurons in control, after training and following spinal cord injury (SCI). (B) Quantification of the spinal motoneurons positive for ChAT immunolabeling. Data are presented as mean  $\pm$  SEM; ns, non-significant.

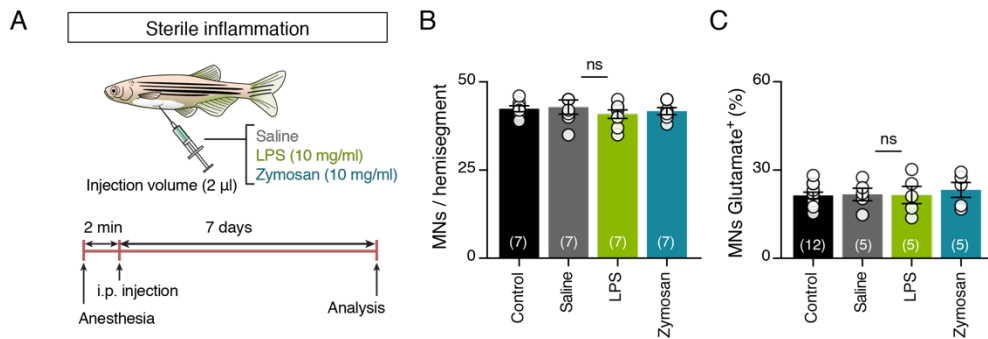

**Fig. S3. Induction of sterile inflammatory response does not alter the motoneuron glutamatergic phenotype.** (A) Experimental design for the induction of acute inflammatory response by single intraperitoneal injection of immunogenic particles LPS or Zymosan. (B) Quantification of the axial motoneuron number per spinal hemisegment. (C) Quantification of the motoneurons that also co-express glutamate. Data are presented as mean  $\pm$  SEM; ns, non-significant. For detailed statistics see *SI Appendix*, Table S1.

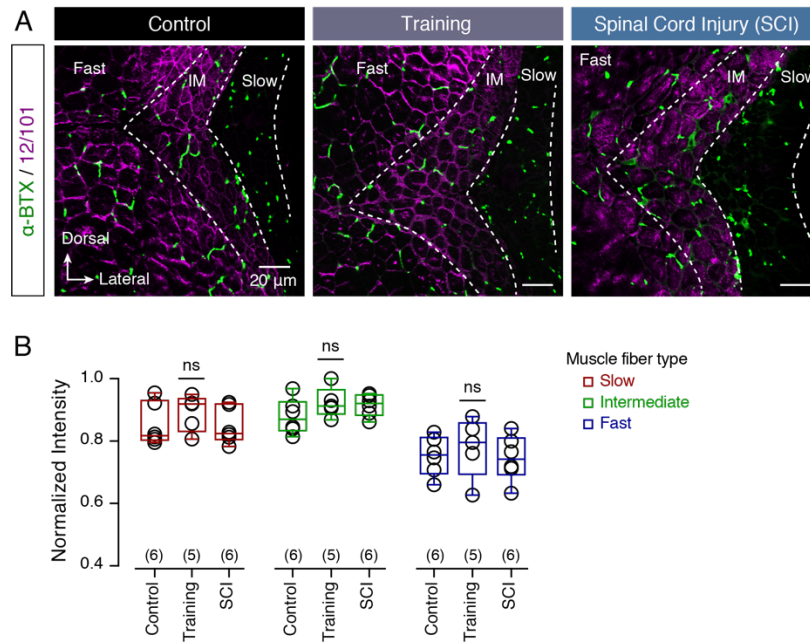

**Fig. S4. Neuromuscular junctions remain the same after training and spinal cord injury.** (A) Representative transverse confocal images from adult zebrafish myotome (purple) showing the location and the number of the neuromuscular junctions ( $\alpha$ -BTX; green) in control and after physical exercise and spinal cord injury. (B) Quantification of the normalized intensity of the  $\alpha$ -BTX staining in slow, intermediate and fast muscle fibers show no significant changes following training and spinal cord injury. Data are presented as boxplots showing the median, 25<sup>th</sup> and 75<sup>th</sup> percentile (box and line), minimal and maximal values (whiskers), mean  $\pm$  SEM; ns, non-significant; IM, intermediate. For detailed statistics see *SI Appendix*, Table S1.

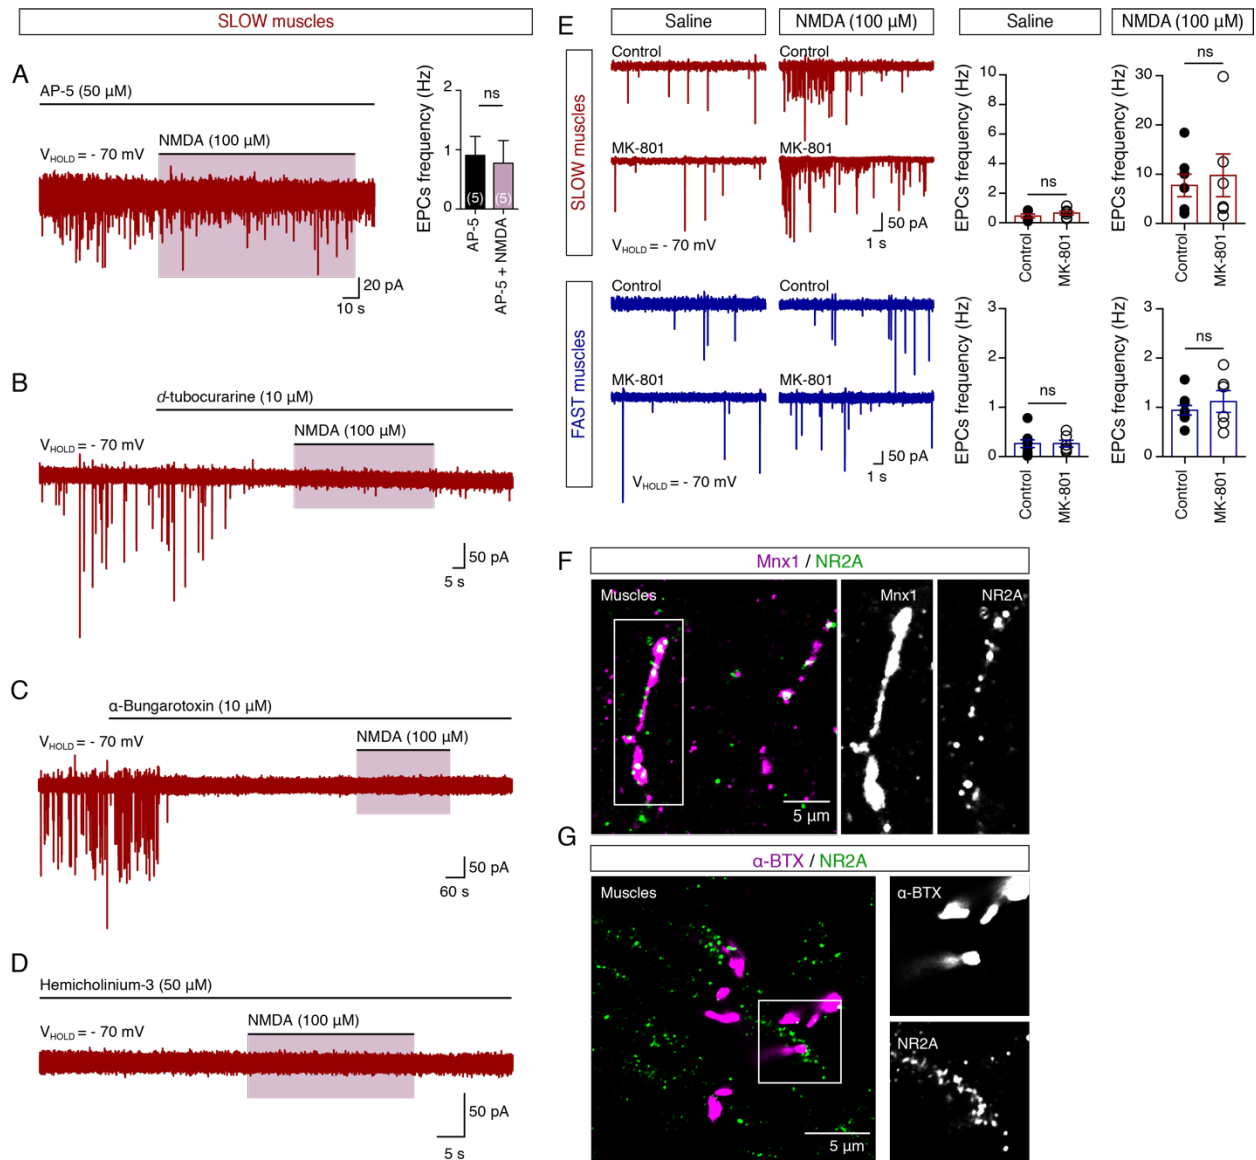

**Fig. S5. Presynaptic NMDA receptors induce muscle activity.** (A) Representative trace of whole cell voltage-clamp recording from slow muscle fiber showing that in a presence of 50  $\mu$ M AP-5 the NMDA-induced ACh release is blocked. (B-D) Representative traces of whole cell voltage-clamp recordings showing that in presence of nicotinic acetylcholine receptor blockers ( $d$ -tubocurarine and  $\alpha$ -Bungarotoxin, 10  $\mu$ M) and the selective blocker of the choline uptake (Hemicholinium-3, 50  $\mu$ M) NMDA cannot induce any EPCs, suggesting that the NMDA receptors are located at the presynaptic terminals, and their activation from glutamate enhance the release of acetylcholine. (E) EPC recordings from both slow and fast muscle fibers in presence of the non-competitive NMDA receptor antagonist (MK-801; 1 mM) in the intracellular solution show no significant changes in the frequency of post-synaptic events. (F) Close apposition of motoneuron axon NR2A expression (green) to the post-synaptic muscle nicotinic receptors ( $\alpha$ -BTX; magenta). (G) NMDA receptor subunit 2B (NR2B) expression (green) on the motoneuron presynaptic terminals at the neuromuscular junctions ( $\alpha$ -BTX; magenta). Whole cell voltage-clamp recordings were obtained at a holding potential of -70 mV in all recordings. Data are presented as mean  $\pm$  SEM; ns, non-significant. For detailed statistics see *S1 Appendix*, Table S1.

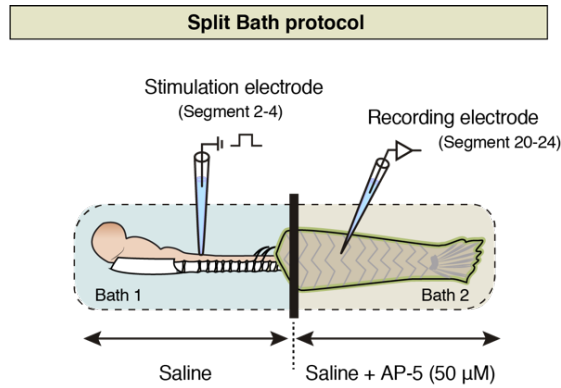

**Fig. S6. Experimental strategy to study the direct release of glutamate in the axial neuromuscular junctions.** Split bath experiment in the adult zebrafish *ex-vivo* preparation. Electrical stimulation of the initial segments (2-4) of spinal cord depolarized supra-threshold the spinal motoneurons to produce muscle twitch. Recordings of EPCs performed from caudal muscle fibers (segment 20-24) in a presence of the NMDA receptor selective blocker AP-5 (50 μM).

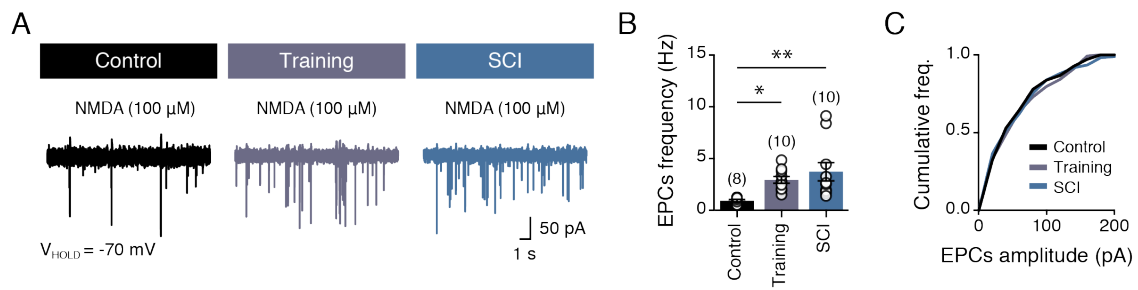

**Fig. S7. Neuromuscular changes after training and SCI.** (A-C) Fast muscle fibers displayed a significant increase in EPCs frequency after bath application of NMDA (100  $\mu$ M) following training and SCI ( $P = 0.01$ , one-way ANOVA). Whole cell voltage-clamp recordings were obtained at a holding potential of -70 mV in all recordings. Data are presented as mean  $\pm$  SEM. \* $P < 0.05$ . For detailed statistics see *SI Appendix*, Table S1.



**Table S1. Detailed statistics.**

| Figure                        | Statistics      | Result                                                                                                                                                                    | Post-hoc Test  | comparison               | Significance | P value    |
|-------------------------------|-----------------|---------------------------------------------------------------------------------------------------------------------------------------------------------------------------|----------------|--------------------------|--------------|------------|
| <b>1B</b>                     | Descriptive     | Mean $\pm$ SEM: 21.41 $\pm$ 1.091                                                                                                                                         |                |                          |              |            |
| <b>1E</b>                     | Descriptive     | Mean $\pm$ SEM <sub>slow</sub> : 42.67 $\pm$ 2.245%<br>Mean $\pm$ SEM <sub>intermediate</sub> : 26.32 $\pm$ 1.911%<br>Mean $\pm$ SEM <sub>fast</sub> : 18.07 $\pm$ 1.036% |                |                          |              |            |
|                               | One-way ANOVA   | F <sub>(3, 49)</sub> = 124.9<br>P < 0.0001                                                                                                                                | Tukey's test   | Slow Intermediate        | ****         | P < 0.0001 |
| Slow Fast                     |                 |                                                                                                                                                                           |                | ****                     | P < 0.0001   |            |
| Intermediate Fast             |                 |                                                                                                                                                                           |                | **                       | P = 0.0012   |            |
| <b>1F</b><br>Soma size        | Unpaired t-test | t = 5.16, df = 108 (Two-tailed)                                                                                                                                           |                | Glutamate+<br>Glutamate- | ****         | P < 0.0001 |
| <b>1F</b><br>Position         | Unpaired t-test | t = 2.364, df = 72 (Two-tailed)                                                                                                                                           |                | Glutamate+<br>Glutamate- | *            | P = 0.0208 |
| <b>2B</b>                     | One-way ANOVA   | F <sub>(2, 14)</sub> = 0.00034                                                                                                                                            |                |                          | ns           | P = 0.999  |
| <b>2C</b>                     | Descriptive     | Mean $\pm$ SEM <sub>Control</sub> : 21.41 $\pm$ 1.091%<br>Mean $\pm$ SEM <sub>Training</sub> : 39.54 $\pm$ 3.014%<br>Mean $\pm$ SEM <sub>SCI</sub> : 33.21 $\pm$ 1.884%   |                |                          |              |            |
|                               | One-way ANOVA   | F <sub>(2,23)</sub> = 26.55<br>P < 0.0001                                                                                                                                 | Dunnett's test | Control Training         | ****         | P = 0.0001 |
|                               |                 | Control SCI                                                                                                                                                               |                | ***                      | P = 0.0003   |            |
| <b>2D</b><br>Slow MNs         | One-way ANOVA   | F <sub>(2,19)</sub> = 0.1243                                                                                                                                              |                |                          | ns           | P = 0.8839 |
| <b>2D</b><br>Intermediate MNs | One-way ANOVA   | F <sub>(2,21)</sub> = 1.069                                                                                                                                               |                |                          | ns           | P = 0.3614 |
| <b>2E</b>                     | One-way ANOVA   | F <sub>(4, 33)</sub> = 17.65<br>P < 0.0001                                                                                                                                | Dunnett's test | Control Training         | ****         | P = 0.0001 |
|                               |                 |                                                                                                                                                                           |                | Control SCI              | ****         | P = 0.0001 |
|                               |                 |                                                                                                                                                                           |                | Control Training-rest    | ns           | P = 0.8012 |
|                               |                 |                                                                                                                                                                           |                | Control SCI-recovery     | ns           | P = 0.6921 |
| <b>2E</b><br>Soma size        | One-way ANOVA   | F <sub>(2,174)</sub> = 4.738<br>P = 0.0099                                                                                                                                | Dunnett's test | Control Training         | **           | P = 0.0088 |
|                               |                 |                                                                                                                                                                           |                | Control SCI              | *            | P = 0.0113 |
| <b>2E</b><br>Position         | One-way ANOVA   | F <sub>(2,117)</sub> = 4.917<br>P = 0.0089                                                                                                                                | Dunnett's test | Control Training         | **           | P = 0.0087 |
|                               |                 |                                                                                                                                                                           |                | Control SCI              | **           | P = 0.0094 |
| <b>3C</b><br>Total distance   | Unpaired t-test | t = 3.284, df = 10 (Two-tailed)                                                                                                                                           |                | Control Training         | *            | P = 0.0106 |
| <b>3C</b><br>Traveled area    | Unpaired t-test | t = 1.701, df = 10 (Two-tailed)                                                                                                                                           |                | Control Training         | ns           | P = 0.1198 |
| <b>3C</b><br>Immobility       | Unpaired t-test | t = 1.628, df = 10 (Two-tailed)                                                                                                                                           |                | Control Training         | ns           | P = 0.1345 |

|                                      |                                          |                                              |                     |                      |              |              |
|--------------------------------------|------------------------------------------|----------------------------------------------|---------------------|----------------------|--------------|--------------|
| <b>3C</b><br>Average velocity        | Unpaired<br><i>t</i> -test               | $t = 2.708, df = 10$ (Two-tailed)            | Control<br>Training | *                    | $P = 0.022$  |              |
| <b>3C</b><br>Max velocity            | Unpaired<br><i>t</i> -test               | $t = 4.361, df = 10$ (Two-tailed)            | Control<br>Training | **                   | $P = 0.0014$ |              |
| <b>3D</b>                            | Unpaired<br><i>t</i> -test               | $t = 4.847, df = 17$ (Two-tailed)            | Control<br>Training | ***                  | $P = 0.0002$ |              |
| <b>4B</b>                            | Unpaired<br><i>t</i> -test               | $t = 3.377, df = 28$ (Two-tailed)            | Control<br>Training | **                   | $P = 0.0022$ |              |
| <b>4D</b><br>Slow muscles            | Unpaired<br><i>t</i> -test               | $t = 6.611, df = 496$ (Two-tailed)           | Control<br>Training | ****                 | $P < 0.0001$ |              |
| <b>4D</b><br>Intermediate<br>muscles | Unpaired<br><i>t</i> -test               | $t = 4.823, df = 549$ (Two-tailed)           | Control<br>Training | ****                 | $P < 0.0001$ |              |
| <b>4D</b><br>Fast muscles            | Unpaired<br><i>t</i> -test               | $t = 0.3116, df = 803$ (Two-tailed)          | Control<br>Training | ns                   | $P = 0.7554$ |              |
| <b>4F</b>                            | One-way<br>ANOVA                         | $F_{(2, 32)} = 240.5,$<br>$P < 0.0001$       | Tukey's test        | Slow<br>Intermediate | ****         | $P < 0.0001$ |
|                                      |                                          |                                              |                     | Slow<br>Fast         | ****         | $P < 0.0001$ |
|                                      |                                          |                                              |                     | Intermediate<br>Fast | ****         | $P < 0.0001$ |
| <b>5B</b>                            | Repeated<br>Measures<br>One-way<br>ANOVA | $F_{(1,216, 6,079)} = 39.07$<br>$P = 0.0006$ | Tukey's test        | Slow<br>Intermediate | **           | $P = 0.0069$ |
|                                      |                                          |                                              |                     | Slow<br>Fast         | **           | $P = 0.0027$ |
|                                      |                                          |                                              |                     | Intermediate<br>Fast | **           | $P = 0.0038$ |
| <b>5C</b><br>Slow muscles            | One-way<br>ANOVA                         | $F_{(2, 18)} = 0.3972$                       |                     | ns                   | $P = 0.678$  |              |
| <b>5C</b><br>Intermediate<br>muscles | One-way<br>ANOVA                         | $F_{(2, 18)} = 2.935$                        |                     | ns                   | $P = 0.0789$ |              |
| <b>5C</b><br>Fast muscles            | One-way<br>ANOVA                         | $F_{(2, 18)} = 8.775$<br>$P = 0.0022$        | Dunnett's test      | Control<br>Training  | **           | $P = 0.0019$ |
|                                      |                                          |                                              |                     | Control<br>SCI       | **           | $P = 0.0060$ |
| <b>5E</b><br>Slow muscles            | One-way<br>ANOVA                         | $F_{(2, 18)} = 11$<br>$P = 0.0008$           | Dunnett's test      | Saline<br>NMDA       | **           | $P = 0.0013$ |
|                                      |                                          |                                              |                     | Saline<br>Washout    | ns           | $P = 0.9974$ |
| <b>5E</b><br>Fast muscles            | One-way<br>ANOVA                         | $F_{(2, 21)} = 10.82$<br>$P = 0.0006$        | Dunnett's test      | Saline<br>NMDA       | ***          | $P = 0.0003$ |
|                                      |                                          |                                              |                     | Saline<br>Washout    | ns           | $P = 0.059$  |
| <b>5F</b>                            | Repeated<br>Measures<br>One-way<br>ANOVA | $F_{(1,557, 6,228)} = 7.172$<br>$P = 0.0279$ | Dunnett's test      | Saline<br>AP-5       | *            | $P = 0.0107$ |
|                                      |                                          |                                              |                     | Saline<br>Washout    | ns           | $P = 0.3555$ |
| <b>5I</b>                            | One-way<br>ANOVA                         | $F_{(2, 30)} = 4.531$<br>$P = 0.0191$        | Dunnett's test      | Control<br>Training  | *            | $P = 0.0215$ |
|                                      |                                          |                                              |                     | Control<br>SCI       | *            | $P = 0.0326$ |
| <b>S3B</b>                           | One-way<br>ANOVA                         | $F_{(3, 25)} = 0.4496$                       |                     | ns                   | $P = 0.7198$ |              |

|                                    |                                         |                                       |                                           |                  |              |              |
|------------------------------------|-----------------------------------------|---------------------------------------|-------------------------------------------|------------------|--------------|--------------|
| <b>S3C</b>                         | One-way ANOVA                           | $F_{(3, 23)} = 0.1856$                |                                           | ns               | $P = 0.9051$ |              |
| <b>S4B</b><br>Slow muscles         | One-way ANOVA                           | $F_{(2, 14)} = 0.7632$                |                                           | ns               | $P = 0.4846$ |              |
| <b>S4B</b><br>Intermediate muscles | One-way ANOVA                           | $F_{(2, 14)} = 1.418$                 |                                           | ns               | $P = 0.2749$ |              |
| <b>S4B</b><br>Fast muscles         | One-way ANOVA                           | $F_{(2, 14)} = 0.3081$                |                                           | ns               | $P = 0.7397$ |              |
| <b>S5A</b>                         | Wilcoxon matched-pairs signed rank test |                                       | AP-5<br>AP-5+NMDA                         | ns               | $P = 0.3125$ |              |
| <b>S5E</b>                         | Unpaired <i>t</i> -test                 | $t = 1.023, df = 11$ (Two-tailed)     | <u>Slow (Saline)</u><br>Control<br>MK-801 | ns               | $P = 0.3285$ |              |
|                                    | Unpaired <i>t</i> -test                 | $t = 0.437, df = 11$ (Two-tailed)     | <u>Slow (NMDA)</u><br>Control<br>MK-801   | ns               | $P = 0.6706$ |              |
|                                    | Unpaired <i>t</i> -test                 | $t = 0.9936, df = 11$ (Two-tailed)    | <u>Fast (Saline)</u><br>Control<br>MK-801 | ns               | $P = 0.9936$ |              |
|                                    | Unpaired <i>t</i> -test                 | $t = 0.8328, df = 11$ (Two-tailed)    | <u>Fast (NMDA)</u><br>Control<br>MK-801   | ns               | $P = 0.4200$ |              |
| <b>S7B</b>                         | One-way ANOVA                           | $F_{(2, 25)} = 5.549$<br>$P = 0.0101$ | Dunnett's test                            | Control Training | *            | $P = 0.0496$ |
|                                    |                                         |                                       |                                           | Control SCI      | **           | $P = 0.006$  |

**Table S2. Antibodies Used<sup>1</sup>**

| <b>Antigen</b>     | <b>Host</b> | <b>Source</b>  | <b>Code</b>               | <b>Dilution</b> |
|--------------------|-------------|----------------|---------------------------|-----------------|
| <b>Primary</b>     |             |                |                           |                 |
| ChAT               | Goat        | Millipore      | AB144P; RRID: AB_2079751  | 1:150           |
| Glutamate          | Rabbit      | Sigma          | G6642; RRID: AB_259946    | 1:6000          |
| Mef2               | Rabbit      | Santa Cruz     | SC313; RRID: AB_631920    | 1:50-1:80       |
| Mnx1               | Mouse       | DSHB           | 81.5C10; RRID: AB_2145209 | 1:50            |
| NR2A               | Rabbit      | Millipore      | 07-632; RRID: AB_310837   | 1:500           |
| NR2B               | Mouse       | BD Biosciences | 610416; RRID: AB_397796   | 1:500           |
| S58                | Mouse       | DSHB           | S58; RRID: AB_528377      | 1:10-1:20       |
| VAcHT              | Goat        | Millipore      | ABN100; RRID: AB_2630394  | 1:500           |
| VGluT1             | Guinea Pig  | Millipore      | AB5905; RRID: AB_2301751  | 1:800           |
| VGluT2             | Guinea Pig  | Millipore      | AB5907; RRID: AB_2301731  | 1:300           |
| 12/101             | Mouse       | DSHB           | 12/101; RRID: AB_531892   | 1:50            |
| <b>Secondary</b>   |             |                |                           |                 |
| Goat IgG-568       | Donkey      | ThermoFisher   | A-11057; RRID: AB_2534104 | 1:500           |
| Goat IgG-488       | Donkey      | ThermoFisher   | A-11055; RRID: AB_2534102 | 1:500           |
| Guinea Pig IgG-568 | Goat        | ThermoFisher   | A-11075; RRID: AB_2534119 | 1:500           |
| Mouse IgG-647      | Donkey      | ThermoFisher   | A-31571; RRID: AB_162542  | 1:500           |
| Mouse IgG-568      | Goat        | ThermoFisher   | A-11004; RRID: AB_2534072 | 1:500           |
| Mouse IgG-488      | Donkey      | ThermoFisher   | A-21202; RRID: AB_141607  | 1:500           |
| Rabbit IgG-488     | Donkey      | ThermoFisher   | A-21206; RRID: AB_2535792 | 1:500           |
| Rabbit IgG-647     | Donkey      | ThermoFisher   | A-31573; RRID: AB_2536183 | 1:500           |
| Rabbit IgG-568     | Donkey      | ThermoFisher   | A-10042; RRID: AB_2534017 | 1:500           |

<sup>1</sup>ChAT, choline-acetyltransferase; mef2, myocyte enhancer factor-2; Mnx1, motoneuron homeobox 1; NR2A, NMDA receptor subunit 2A; NR2B, NMDA receptor subunit 2B; S58, Myosin heavy chain, slow contracting muscle; VAcHT, vesicular acetylcholine transporter; VGluT1, vesicular glutamate transporter 1; VGluT2, vesicular glutamate transporter 2; 12/101, skeletal muscle marker, 102 kDa.
